# Supplementary material for: Responsive morphology transition from micelles to vesicles based on dynamic covalent surfactants
Source: Royal Society of Chemistry journal article supplement (doi:10.1039/c9sm00009g), 2019-01-01
Supplement: c9sm00009g1.pdf [file c9sm00009g1.pdf]

## Electronic Supplementary Information (ESI) for

### Responsive morphology transition from micelles to vesicles based on dynamic covalent surfactant

Pengxiang Wang,<sup>a,b,c</sup> Tongyu Zhu,<sup>a,b</sup> Xiaoyu Hou,<sup>a,b</sup> Yilu Zhao,<sup>a,b</sup> Xiangfeng Zhang,<sup>a,b</sup>  
Hongbin Yang,<sup>\*,a,b</sup> and Wanli Kang<sup>\*,a,b</sup>

<sup>a</sup> Shandong Key Laboratory of Oilfield Chemistry, School of Petroleum Engineering, China University of Petroleum (East China), Qingdao 266580, P. R. China.

<sup>b</sup> Key Laboratory of Unconventional Oil & Gas Development (China University of Petroleum (East China)), Ministry of Education, Qingdao, 266580, P.R. China.

<sup>c</sup> School of Mining & Petroleum Engineering, University of Alberta, Edmonton, Alberta, T6G 2V4, Canada.

\* Corresponding author. Email address: hongbinyang@upc.edu.cn (H. Yang); kangwanli@126.com (W. Kang)

## Experimental:

### Calculation of species distribution

The dissociation constant ( $pK_a$ ) of HB and OA are found at 7.61 and 10.65 respectively at 25°C on a website (<https://www.chemicalbook.com>). As a monobasic acid, the HB has two states of natural and deprotonation ( $HB^-$ ) at the same pH, and the distribution of the species at different pH conditions can be calculated by the equation 1-2:

$$[HB]\% = \frac{c_{[H^+]}}{K_a + c_{[H^+]}} \times 100\% \quad (1)$$

$$[HB^-]\% = \frac{K_a}{K_a + c_{[H^+]}} \times 100\% \quad (2)$$

As we know, the  $K_a$  and  $c_{[H^+]}$  can be calculated from  $pK_a$  and  $pH$  value by the following equations:

$$pK_a = -\lg K_a \quad (3)$$

$$pH = -\lg c_{[H^+]} \quad (4)$$

According to the above formula, we can calculate the species distribution of HB at different pH, and the species distribution of OA is calculated using the same method.

$$[OA]\% = \frac{K_a}{K_a + c_{[H^+]}} \times 100\% \quad (5)$$

$$[\text{OA}^+] \% = \frac{c_{[\text{H}^+]}}{K_a + c_{[\text{H}^+]}} \times 100\% \quad (6)$$

The species distribution calculation of CTAB/HB/OA solution is more complicated due to the fabrication of HB-OA, and the HB and OA are present as HB, HB<sup>-</sup>, OA, OA<sup>+</sup> (protonated OA), HB-OA and HB-OA<sup>-</sup> (deprotonated HB-OA) in this condition. However, the relationship between the conversion of surfactant and pH ( $X_{pH}$ ) can be concluded in equation 7 from the results of <sup>1</sup>H NMR:

$$S \% = (0.0452 X_{pH}^5 - 1.7915 X_{pH}^4 + 26.6361 X_{pH}^3 - 182.3109 X_{pH}^2 + 574.0762 X_{pH} - 663.9291) \times 100\% \quad (7)$$

Besides, the ability of HB and HB<sup>-</sup> to form the anionic surfactant through the imine bond is equally. Therefore, the content of HB-OA and HB-OA<sup>-</sup> can be calculated by equation 6 and 7:

$$[\text{HB-OA}] \% = S \% * [\text{HB}] \% \quad (8)$$

$$[\text{HB-OA}^-] \% = S \% * [\text{HB}^-] \% \quad (9)$$

And the residual HB and HB<sup>-</sup> at different pH can be calculated by the following equations:

$$R_{[\text{HB}]} \% = [\text{HB}] \% - [\text{HB-OA}] \% \quad (10)$$

$$R_{[\text{HB}^-]} \% = [\text{HB}^-] \% - [\text{HB-OA}^-] \% \quad (11)$$

For the residual OA, it is also divided into protonated and natural states, and in accordance with the distribution of equations 5 and 6. So the species distribution of OA was obtained from equation 12 and 13:

$$R_{[\text{OA}]} \% = (1 - S \%)*[\text{OA}] \% \quad (12)$$

$$R_{[\text{OA}^+]} \% = (1 - S \%)*[\text{OA}^+] \% \quad (13)$$

### Additional Results:

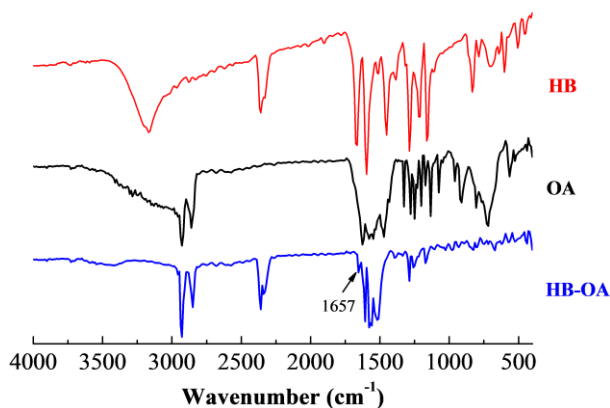

Fig.S1 FTIR spectra of HB (red), OA (black), and HB-OA (blue).

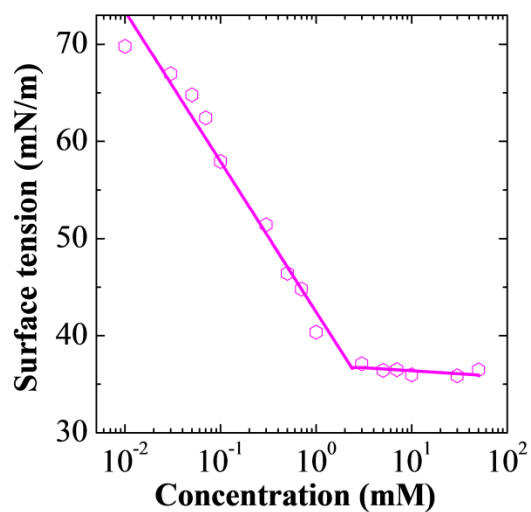

Fig.S2 Variation in surface tension with concentration of HB-OA at pH 12.02 and 25°C.

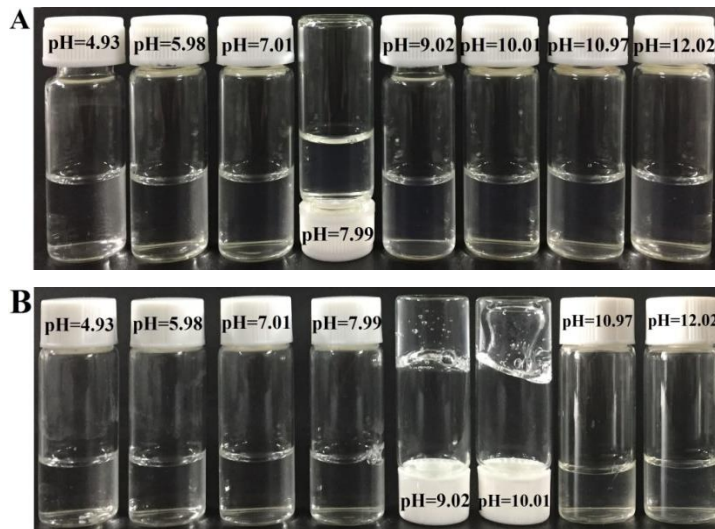

Fig.S3 Macroscopic appearance of (A) CTAB/HB and (B) CTAB/phenol aqueous solution at various pH and 25°C.

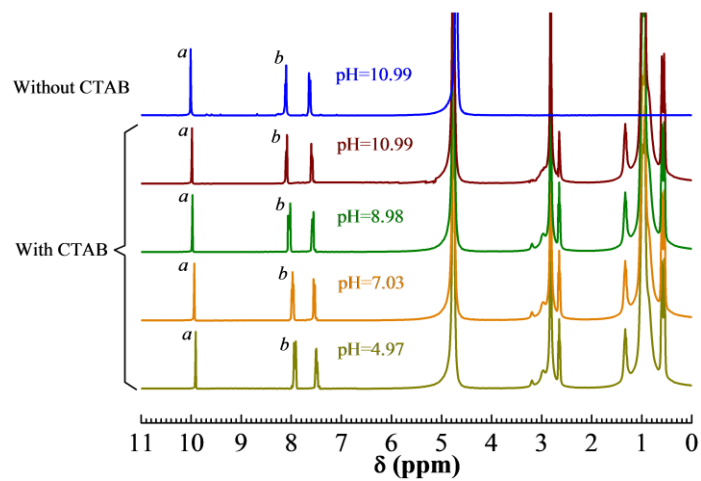

Fig.S4 The <sup>1</sup>H NMR spectra of CTAB/HB at different pH and 25°C.

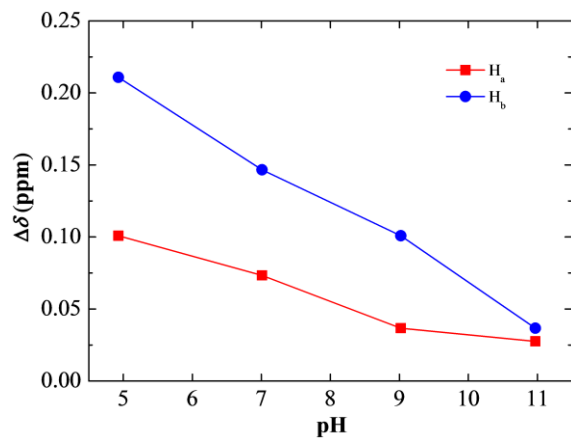

Fig.S5 Variation of chemical shift change  $\Delta\delta$  on the proton b at different pH.

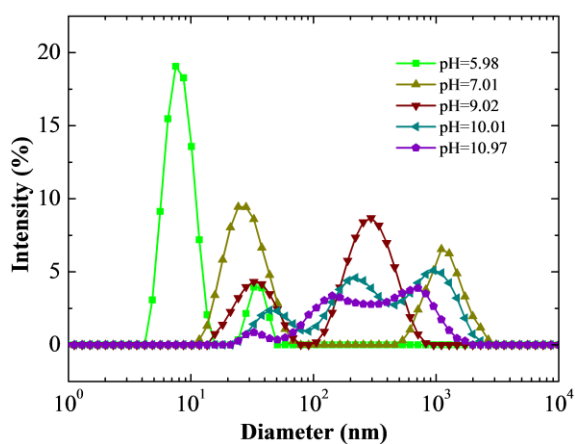

Fig.S6 Effects of pH on the hydrodynamic diameter of the aggregates at 25°C.

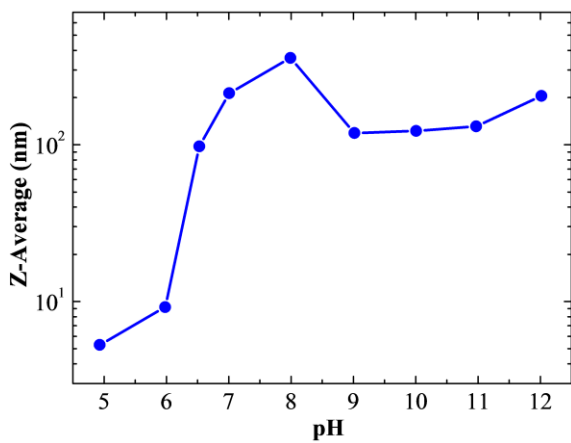

Fig.S7 Effects of pH on the average diameter size at 25°C.

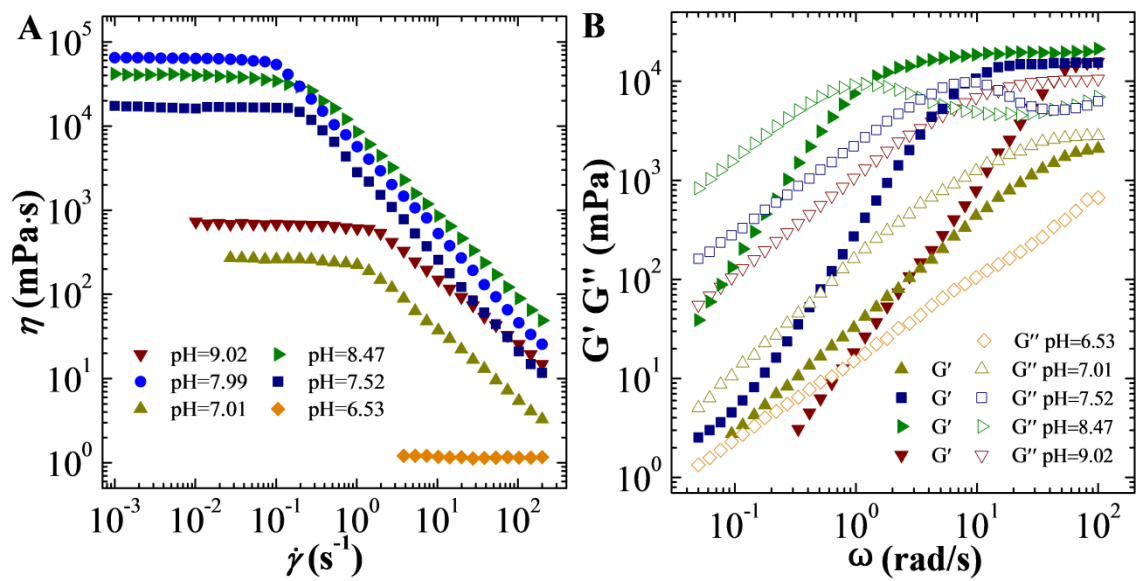

**Fig.S8** Steady (A) and dynamic (B) rheological behaviors of CTAB/HB/OA solutions at different pH and 25 °C.

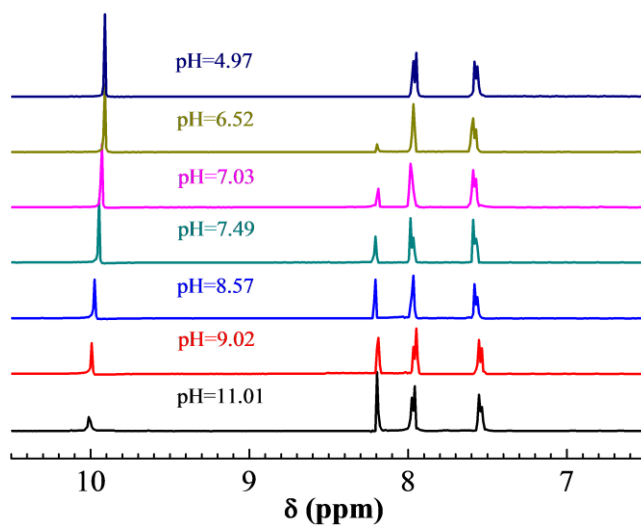

**Fig.S9** The <sup>1</sup>H NMR spectra of CTAB/HB/OA at different pH and 25°C.

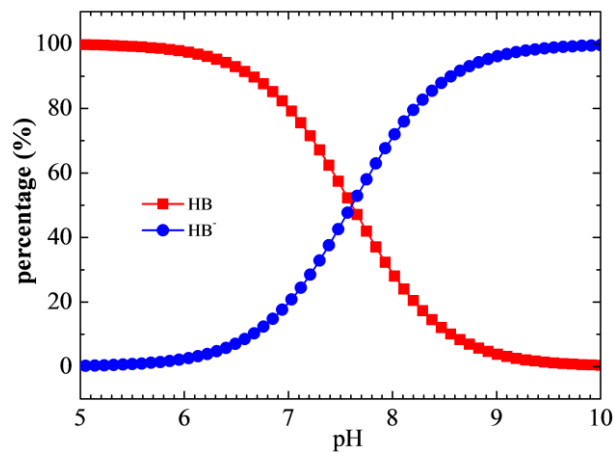

Fig.S10 Species distribution resulting from an aqueous solution of HB at 25 °C.

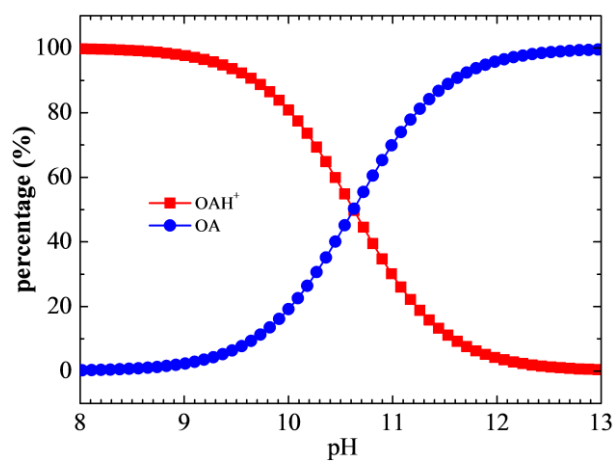

Fig.S11 Species distribution resulting from an aqueous solution of OA at 25 °C.

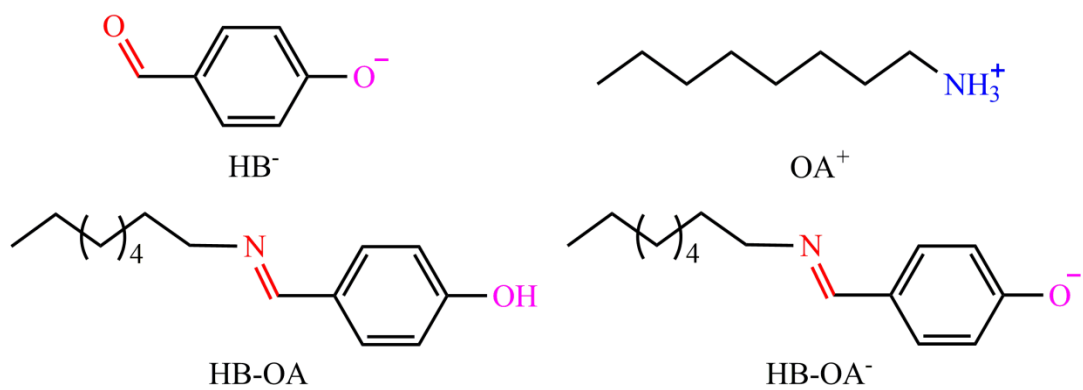

Fig.S12 Chemical structures of  $\text{HB}^-$ ,  $\text{OA}^+$ ,  $\text{HB-OA}$  and  $\text{HB-OA}^-$ .

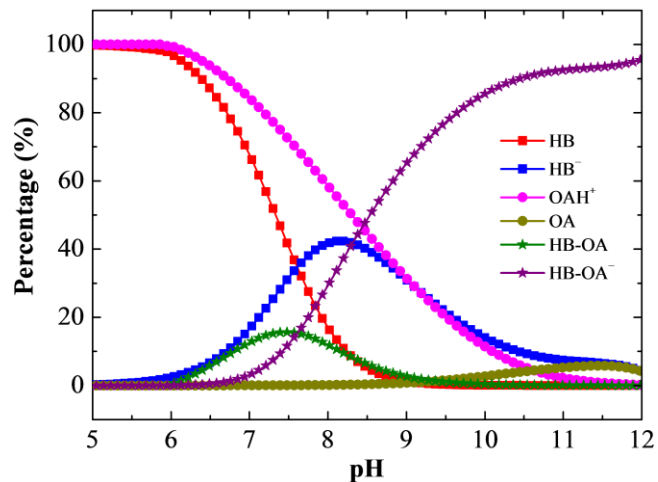

Fig.S13 Species distribution resulting from an aqueous solution of HB/OA at 25 °C.

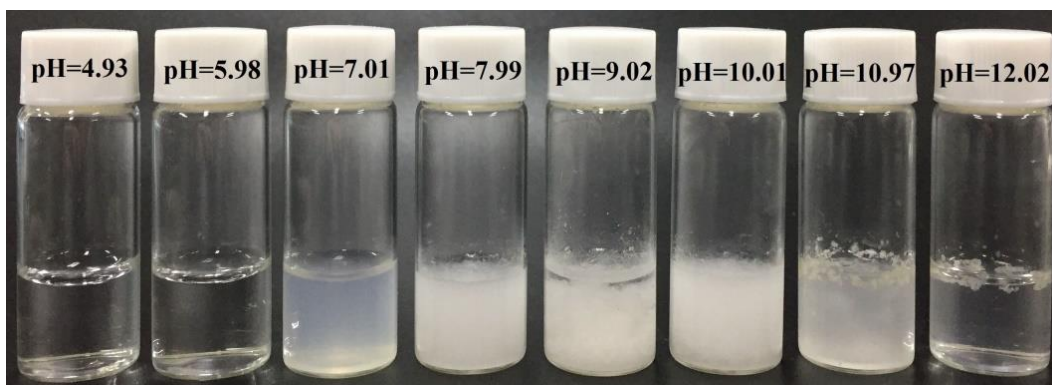

Fig.S14 Macroscopic appearance of HB/OA aqueous solution at various pH and 25°C.

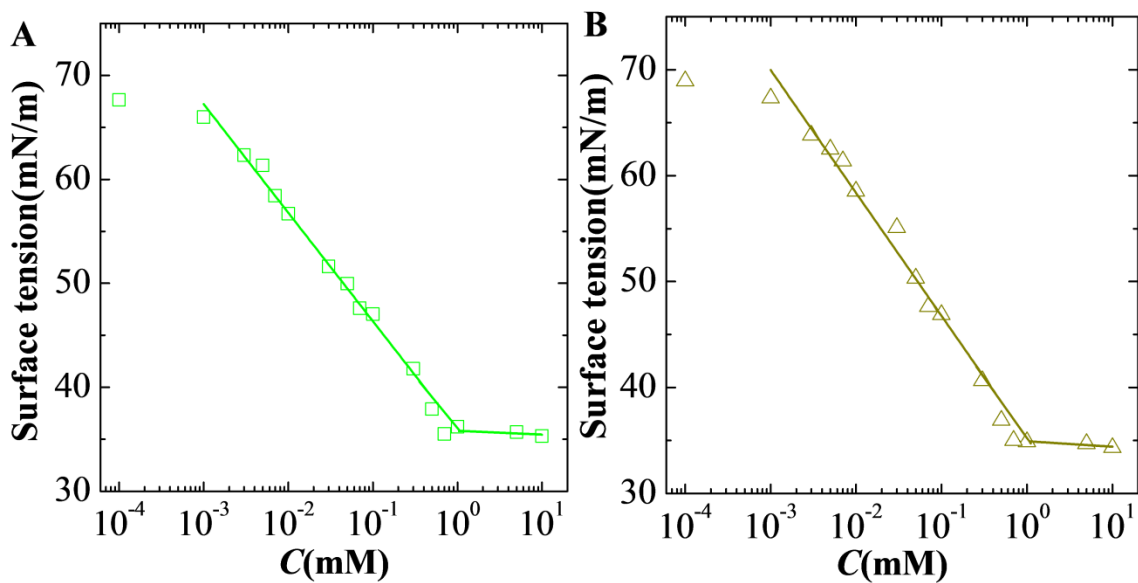

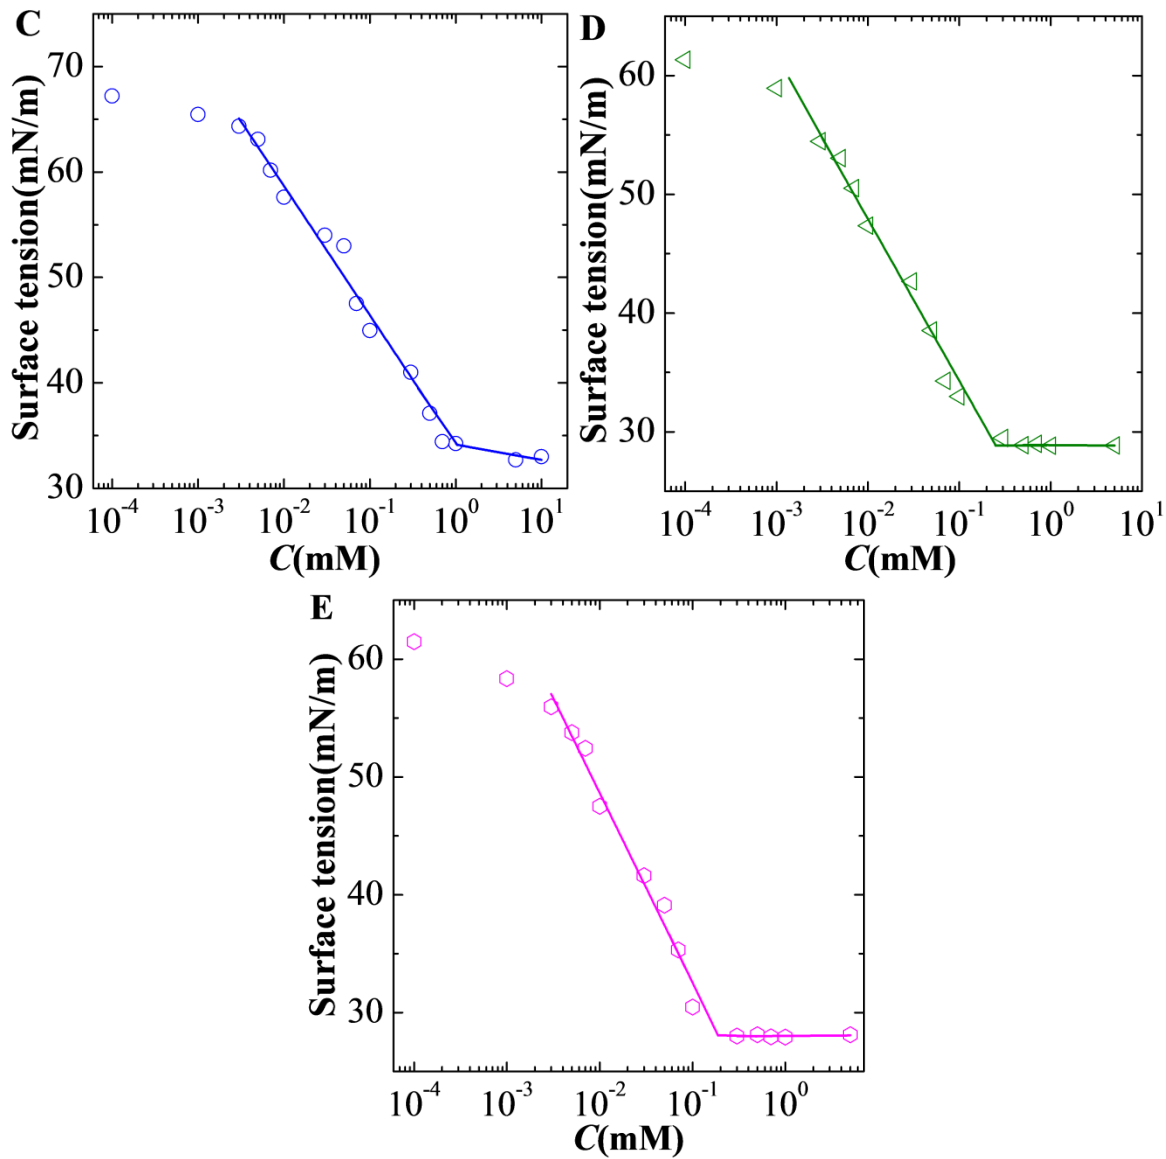

**Fig.S15** Variation in surface tension with concentration of CTAB/HB/OA at (A) pH=5.98, (B) pH=7.01, (C) pH=7.99, (D) pH=10.01, (E) pH=12.02, and

25°C.
